# Supplementary material for: Application of hydrotalcite in soil immobilization of iodate (IO3−)
Source: Royal Society of Chemistry journal article supplement (doi:10.1039/c8ra04013c), 2018-01-01

## Supplementary Materials

### Application of hydrotalcite in soil immobilization of iodate ( $\text{IO}_3^-$ )

D. Zhang,<sup>a,b</sup> X. Y. Liu<sup>c</sup>, H. T. Zhao<sup>\*a</sup>, L. Yang,<sup>a</sup> T. Lü<sup>a</sup>, and M. Q. Jin<sup>a</sup>

- a. College of Materials and Environmental Engineering, Hangzhou Dianzi University, Hangzhou, Zhejiang 310018, China. Email: info-iem@hdu.edu.cn; Tel: +86-571-87713572
- b. College of Environmental & Resource Sciences, Zhejiang University, Hangzhou, Zhejiang 310058, China. Email: zhangdong@hdu.edu.cn; Tel: +86-571-86919158
- c. Guangdong Dazhong Agribulture Science Co. Ltd, Dongguan, 523169, China

Figures: 3

**Fig. S1** Effects of initial iodate concentration on the removal of  $\text{IO}_3^-$  by using the  $\text{Mg}_2\text{-Al-NO}_3$  LDH.

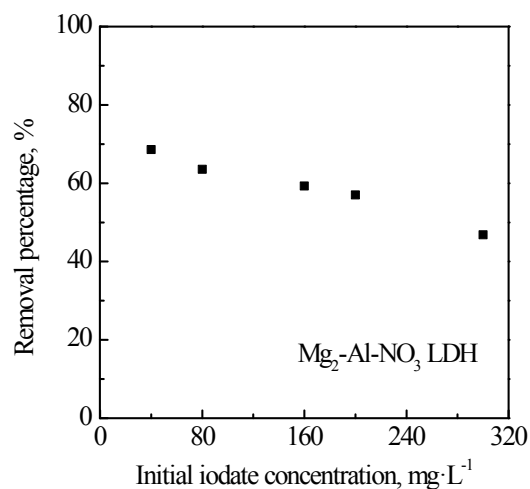

**Fig. S2** Effects of sorbent dosage on the removal of  $\text{IO}_3^-$  by using the  $\text{Mg}_2\text{-Al-NO}_3$  LDH.

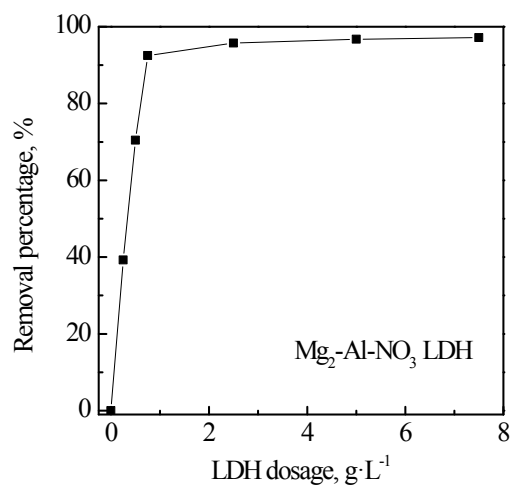

**Fig. S3** Effects of temperature on the sorption amount of  $\text{IO}_3^-$  by using the  $\text{Mg}_2\text{-Al-NO}_3$  LDH.

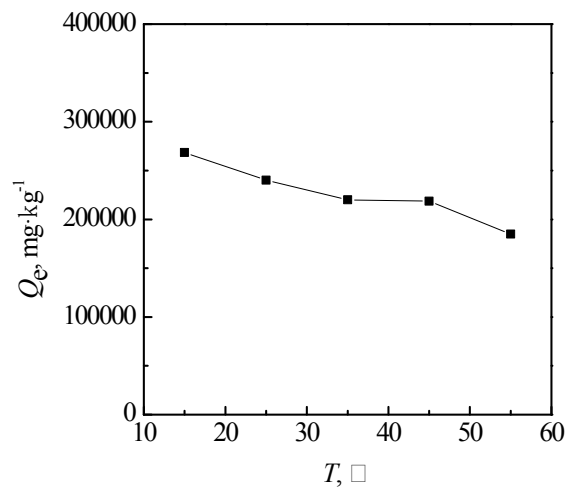

Supplement: c8ra04013c1.pdf [file c8ra04013c1.pdf]
